# Supplementary material
Source: PubMed Central journal article supplement (PMC2738694)
Supplement: emboj2009178s5.pdf [file emboj2009178s5.pdf]

Manuscript EMBO-2009-70484

## Regulation of myogenin expression during muscle differentiation by FAK interaction with MBD2

Shi-Wen Luo, Chun Zhang, Chang-Hoon Kim, Yuan-Zheng Qiu, Quang-Sheng Du, Lin Mei

*Corresponding author: Wen-Cheng Xiong, Medical College of Georgia*

---

**Review timeline:**

Submission date:

26 January 2009

Accepted:

28 May 2009

---

An earlier version of this manuscript was submitted to *The EMBO Journal* and assessed before January 2009. As the original review of the manuscript therefore predates the implementation of *The EMBO Journal's* transparent review process policy, no Review Process File is available with this article.
